# Supplementary material for: ERK1/2 Signalling Pathway Regulates Tubulin-Binding Cofactor B Expression and Affects Astrocyte Process Formation after Acute Foetal Alcohol Exposure
Source: MDPI journal article supplement (doi:10.3390/brainsci12070813), 2022-06-22
Supplement: s1 [file s1]

**Supplementary S1. Astrocytes identify by GFAP and localizations of all the proteins in this study shown in full-length Western Blot image. (A)** Astrocytes identify by GFAP. **(B)** Anti-TBCB (1:500, A13248, ABclonal, China), **(C)** Anti- $\alpha$ -T(1: 5000, GTX628802, GeneTex, USA), **(D)** Anti- $\beta$ -actin (1:5000,20536-1-AP, Proteintech, China), **(E)** Anti- $\beta$ -T (1:5000, TA503129, OriGene, USA), **(F)** Anti-GAPDH (1:5000, 60004-1-Ig, Proteintech, China), **(G)** Anti-ERK (1:1000, #4695, Cell Signaling Technology, USA), **(H)** Anti-pERK (1:1000, #4370, Cell Signaling Technology, USA), **(I)** Anti-p38 (1:1000, #8690, Cell Signaling Technology, USA), **(J)** Anti-pp38 (1:800, #4511, Cell Signaling Technology, USA), **(K)** Anti-JNK (1:1000, #9252, Cell Signaling Technology, USA), **(L)** Anti-p-JNK (1:1000, #4668, Cell Signaling Technology, USA).
