# Supplementary material for: ERK1/2 Signalling Pathway Regulates Tubulin-Binding Cofactor B Expression and Affects Astrocyte Process Formation after Acute Foetal Alcohol Exposure
Source: Brain Sci. 2022 Jun 22;12(7):813. doi: 10.3390/brainsci12070813 (PMC9312805; doi:10.3390/brainsci12070813)
Supplement: Supplementary file 1 [file brainsci-12-00813-s001.zip]

Archive with 4 entries (4 files):
- Suppl.S1 legend.pdf
- Suppl.S1-S2.pdf
- Suppl.S2 legend.pdf
- suppl.S2.pdf
