# Supplementary figures and images for: ERK1/2 Signalling Pathway Regulates Tubulin-Binding Cofactor B Expression and Affects Astrocyte Process Formation after Acute Foetal Alcohol Exposure
Source: MDPI journal article supplement (doi:10.3390/brainsci12070813), 2022-06-22

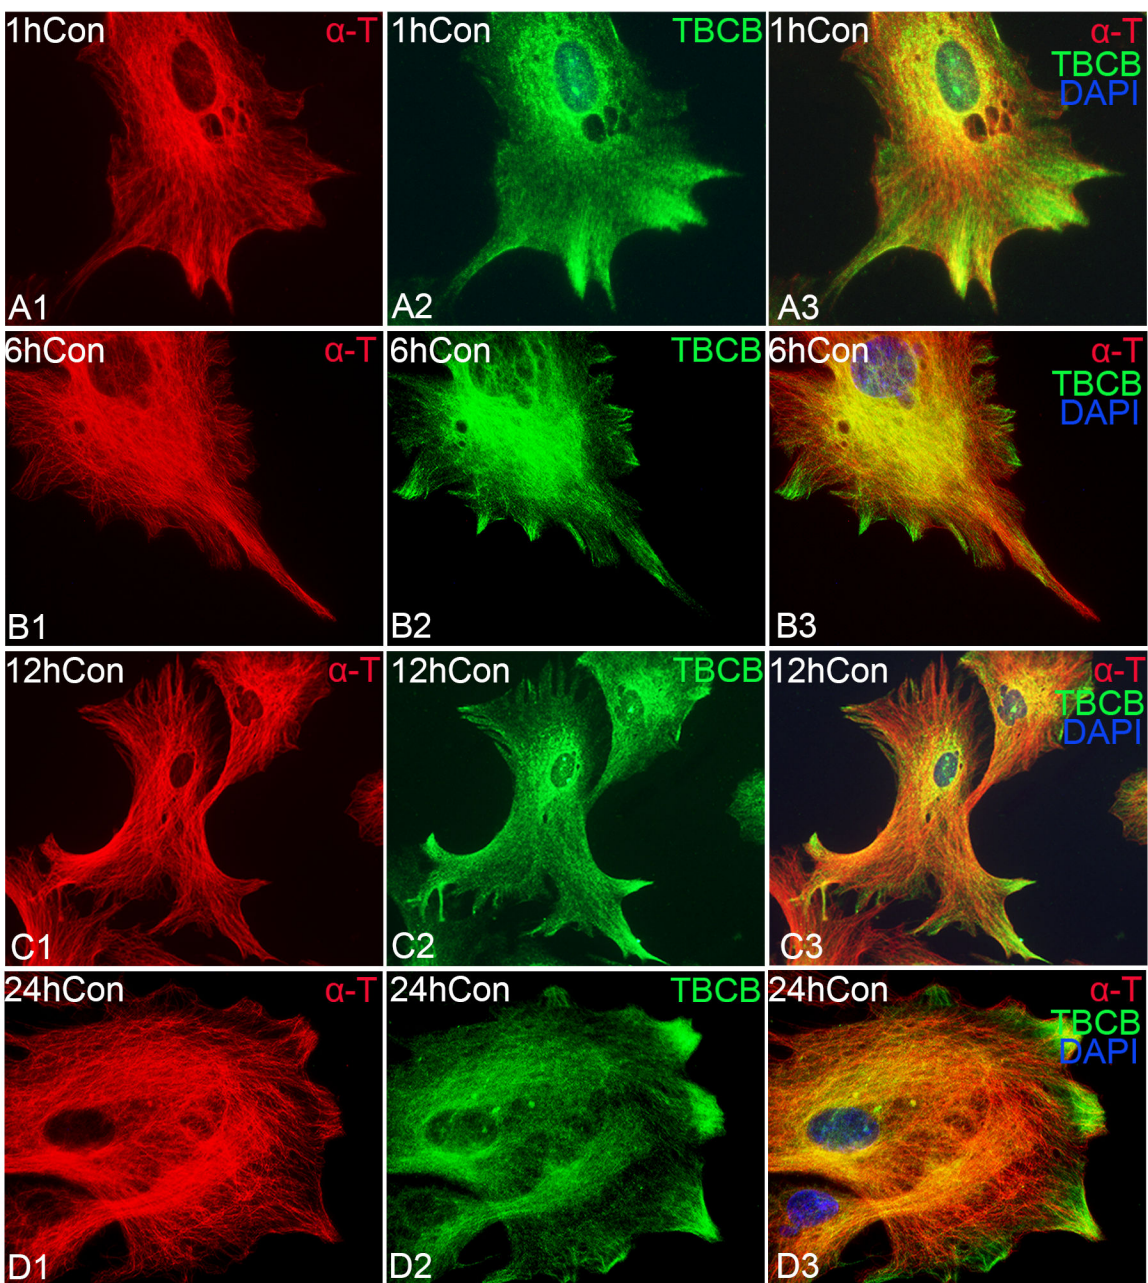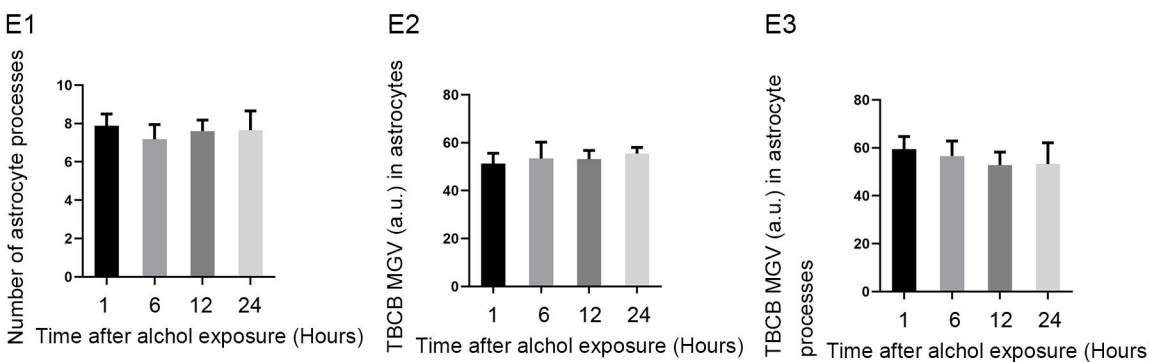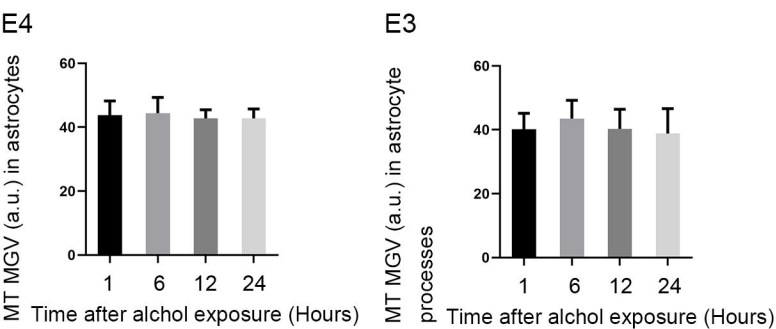

Supplement: s1 [file s1]

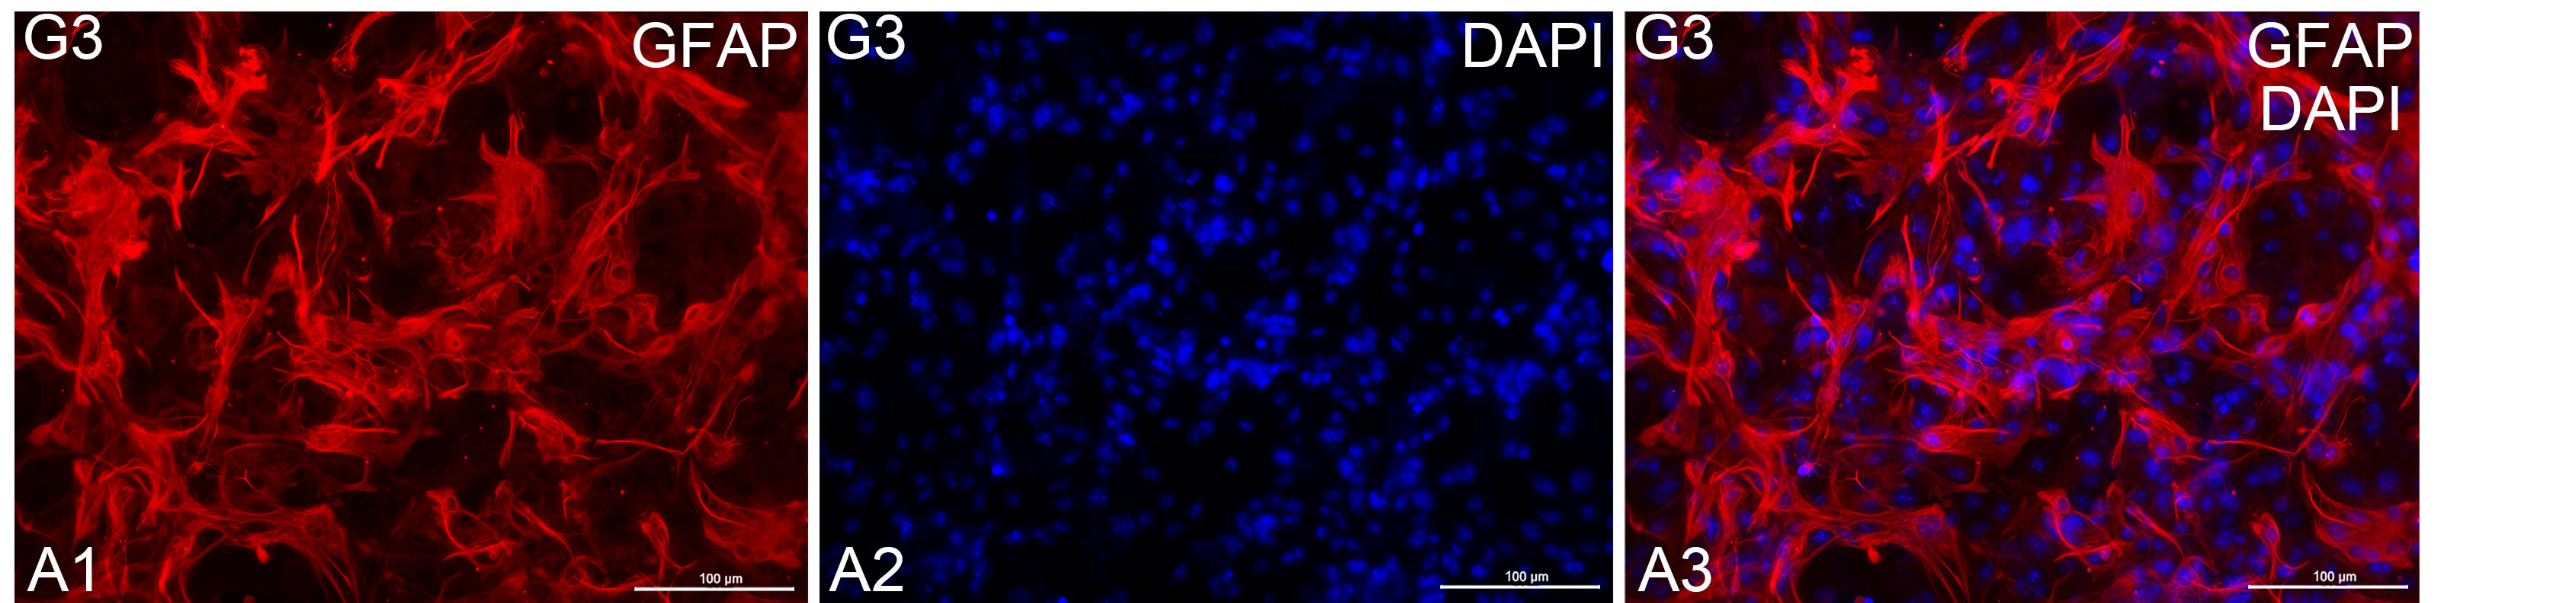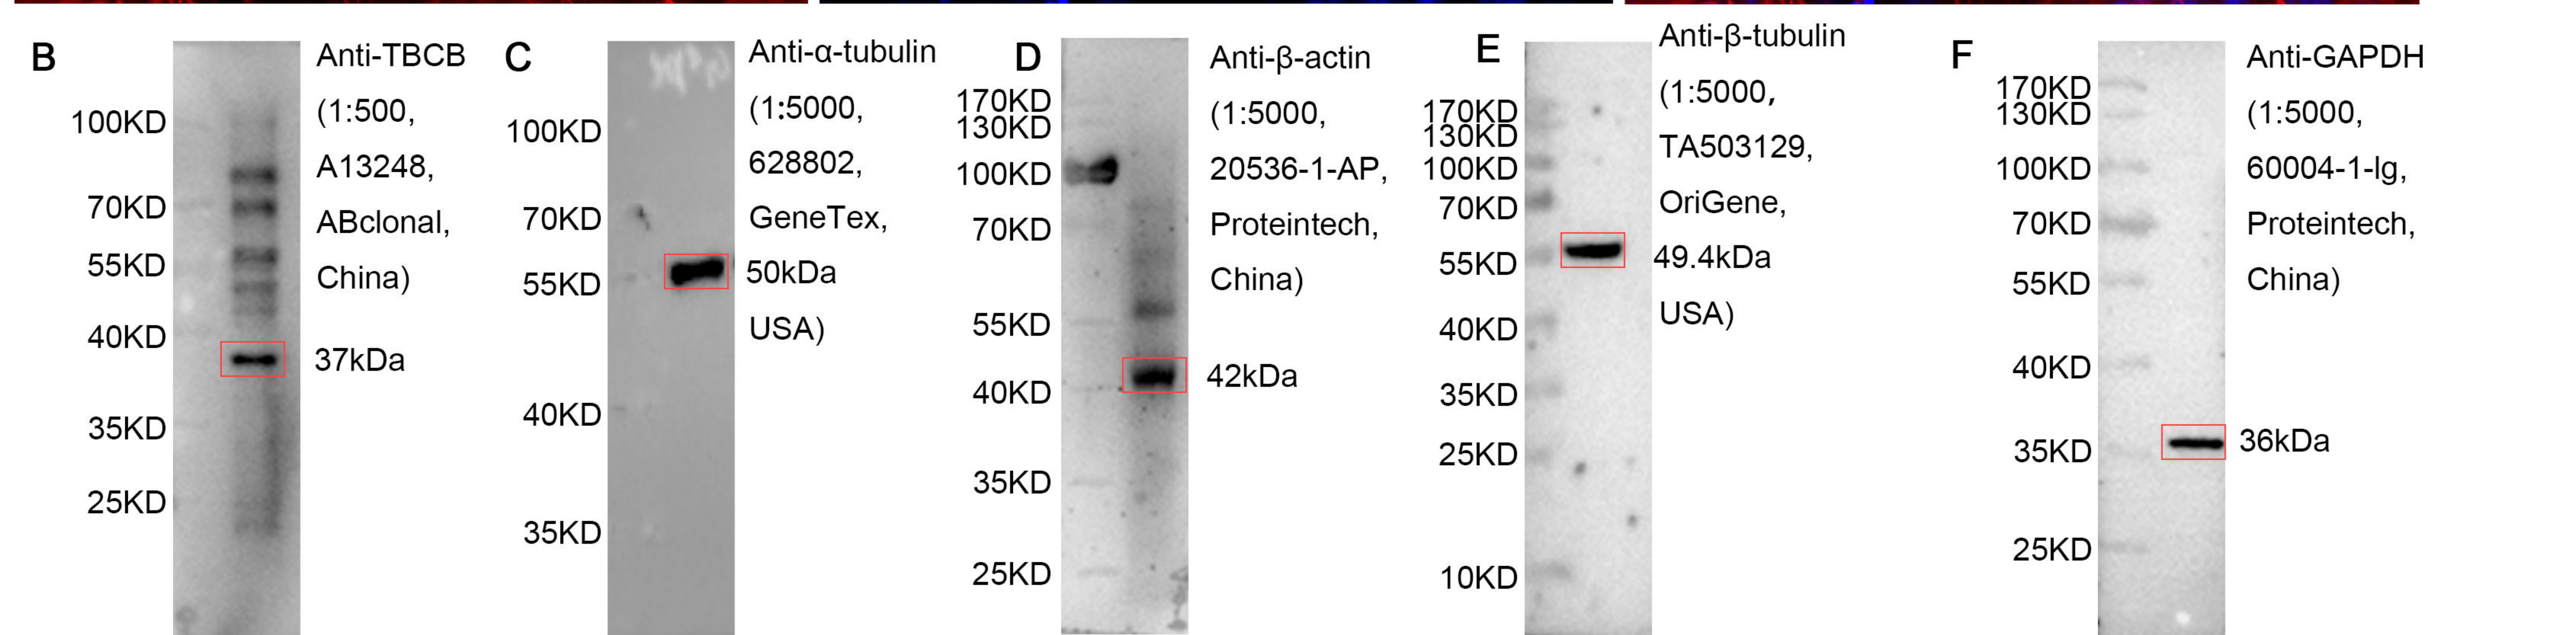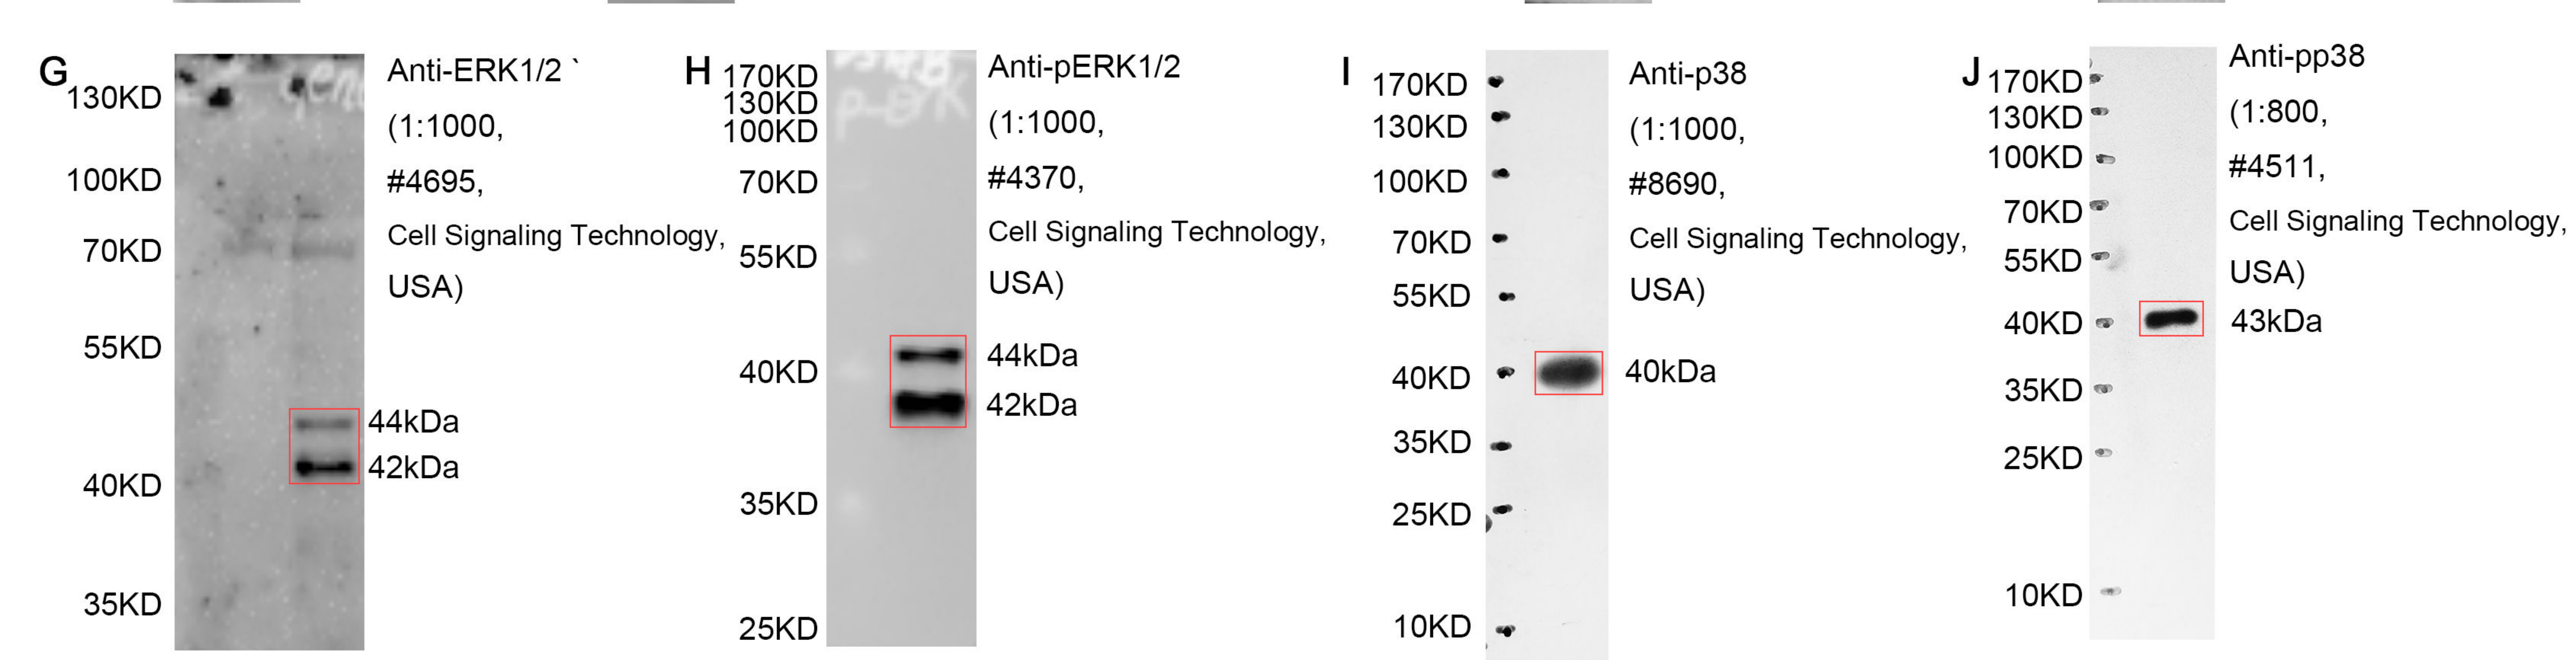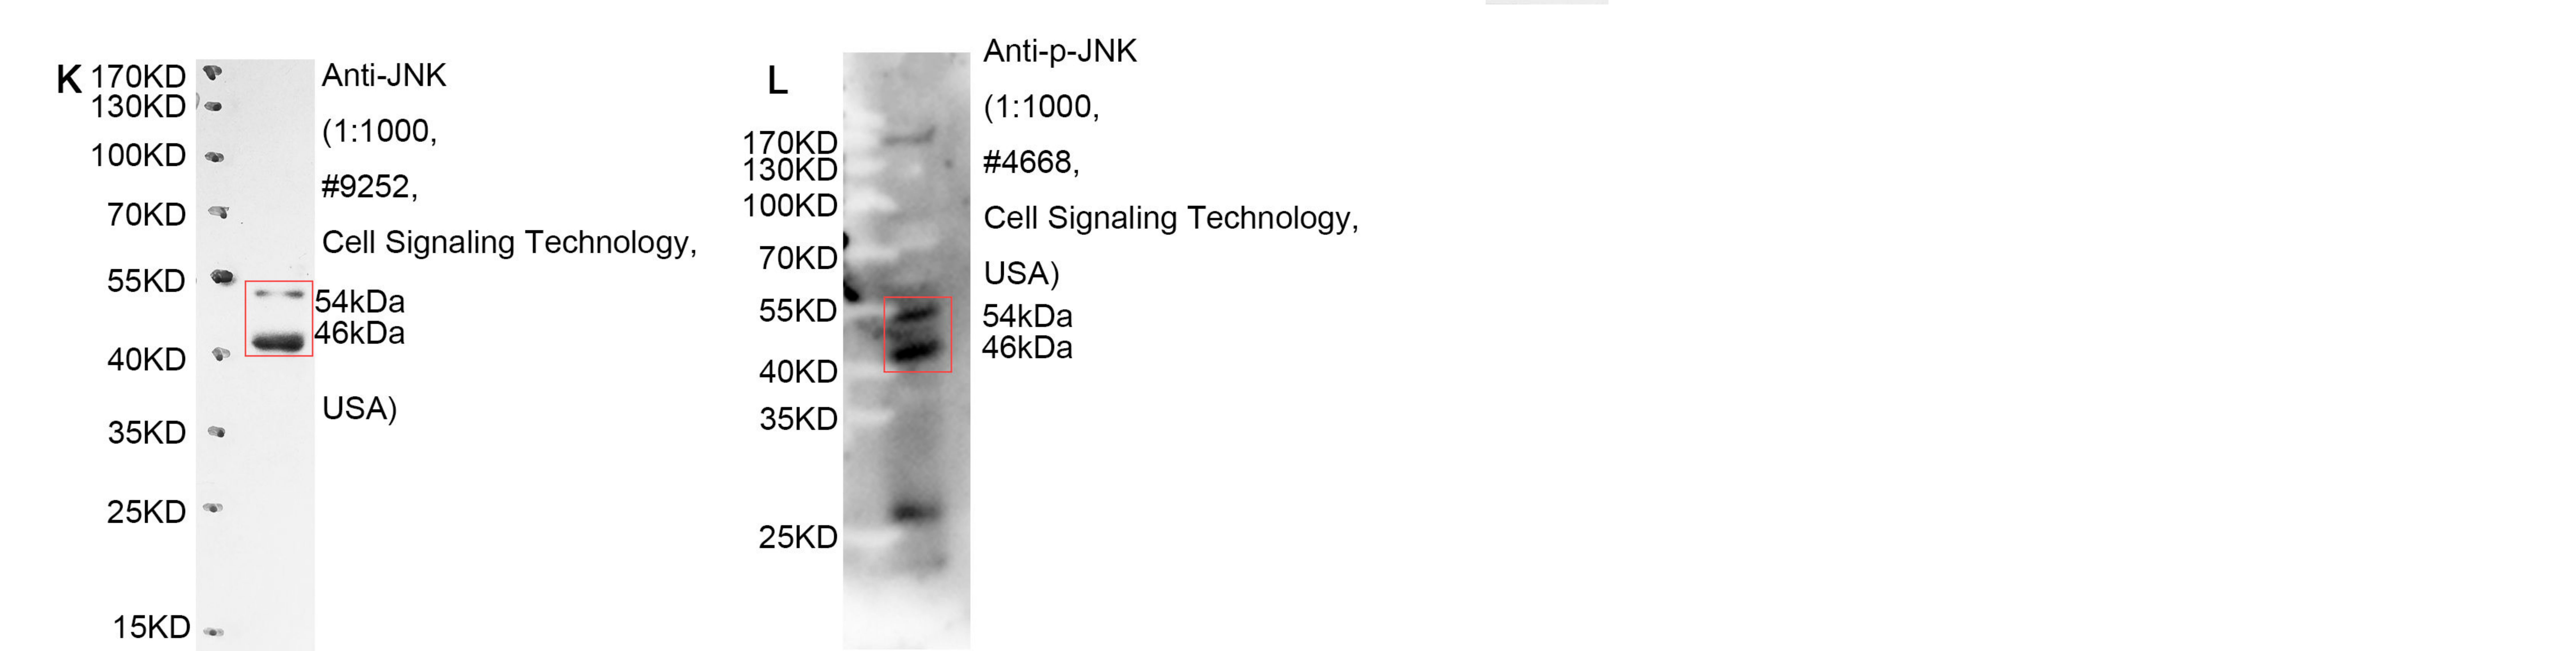

Supplement: s1 [file s1]
